# Supplementary material for: Postnatal adaptations of phosphatidylcholine metabolism in extremely preterm infants: implications for choline and PUFA metabolism
Source: PubMed Central journal article supplement (PMC7727469; doi:10.1093/ajcn/nqaa207), 2020-08-10
Supplement: nqaa207_supplemental_file.pdf [file nqaa207_supplemental_file.pdf]

Postnatal adaptations of phosphatidylcholine metabolism in extremely preterm infants: implications for choline and polyunsaturated fatty acid metabolism. Goss K.C.W. "Online Supplementary Material"

### **Online Supporting Material**

### **Postnatal adaptations of phosphatidylcholine metabolism in extremely preterm infants: implications for choline and polyunsaturated fatty acid metabolism**

Kevin C.W. Goss<sup>1,2</sup>, Victoria M. Goss<sup>2</sup>, J. Paul Townsend<sup>2</sup>, Grielof Koster<sup>2</sup>, Howard W. Clark<sup>1,2</sup> & Anthony D. Postle<sup>1,2</sup>

<sup>1</sup>Child Health, Academic Unit of Clinical & Experimental Sciences, Faculty of Medicine, University of Southampton and <sup>2</sup>NIHR Southampton

Respiratory Biomedical Research Unit, University Hospitals Southampton, Southampton, UK

Postnatal adaptations of phosphatidylcholine metabolism in extremely preterm infants: implications for choline and polyunsaturated fatty acid metabolism. Goss K.C.W. "Online Supplementary Material"

**Online Supporting Material**

**Supplementary Table 1 Composition of total parenteral nutrition**

**Fatty acid composition of ClinOleic 20%**

|                                    |      |
|------------------------------------|------|
| Saturated (% total)                | 15   |
| Monounsaturated (% total)          | 65   |
| Polyunsaturated (% total)          | 20   |
| Unsaturated fatty acid composition |      |
| Oleate (% total)                   | 58.3 |
| Linoleate (% total)                | 17.7 |
| Arachidonate (% total)             | 0.3  |
| Linolenate (% total)               | 2.0  |
| Docosahexaenoate (% total)         | 0.23 |

**Parenteral nutrition composition**

|                     | Preterm TPN | ClinOleic 20% |
|---------------------|-------------|---------------|
| Energy (kcal/ml)    | 0.63        | 1.67          |
| Protein (g/ml)      | 0.02        | 0.00          |
| Carbohydrate (g/ml) | 0.13        | 0.00          |
| Fat (g/ml)          | 0.00        | 1.67          |
| Choline (mg/ml)     | 0.00        | 1.04          |
| Methionine (mg/ml)  | 0.60        | 0.00          |

Postnatal adaptations of phosphatidylcholine metabolism in extremely preterm infants: implications for choline and polyunsaturated fatty acid metabolism. Goss K.C.W. "Online Supplementary Material"

**Online Supporting Material**

**Supplementary Table 2. Concentrations of individual molecular species of plasma phosphatidylcholine from preterm infants over the first 5 day of the study.**

Results are presented as median values with inter-quartile ranges indicated (µmoles/litre).

Formulae are described by total number of fatty acyl carbon atoms and unsaturated double bonds, with the major molecular species indicated in column 2.

| PC species | Major acyl composition | t=0h   |      |      | t=6h   |      |      | t=12h  |      |      | t=24h  |      |      | t=48h  |      |      | t=72h  |      |      | t=96h  |      |      | t=120h |      |      |
|------------|------------------------|--------|------|------|--------|------|------|--------|------|------|--------|------|------|--------|------|------|--------|------|------|--------|------|------|--------|------|------|
|            |                        | Median | 25%  | 75%  | Median | 25%  | 75%  | Median | 25%  | 75%  | Median | 25%  | 75%  | Median | 25%  | 75%  | Median | 25%  | 75%  | Median | 25%  | 75%  | Median | 25%  | 75%  |
| total      |                        | 482    | 388  | 798  | 610    | 470  | 803  | 725    | 504  | 896  | 770    | 539  | 1171 | 882    | 539  | 1106 | 830    | 655  | 1395 | 1019   | 824  | 824  | 1044   | 750  | 1323 |
| PC30:0     | PC16:1_16:1            | 2.97   | 2.32 | 3.85 | 2.79   | 2.37 | 4.12 | 3.26   | 2.29 | 4.25 | 3.79   | 2.63 | 5.02 | 2.6    | 2.2  | 3.74 | 2.44   | 1.7  | 3.25 | 2.4    | 1.79 | 1.79 | 1.87   | 1.67 | 2.8  |
| PC32:1     | PC16:0_16:1            | 17.1   | 13.3 | 29.4 | 23.2   | 15.8 | 29.1 | 24.9   | 13.6 | 30.1 | 26.8   | 15.9 | 36.5 | 21.2   | 13.2 | 26.1 | 15     | 11.4 | 26.4 | 15.8   | 10   | 10   | 13.7   | 9.07 | 21.4 |
| PC32:0     | PC16:0_16:0            | 19.8   | 15.7 | 25.2 | 20.8   | 15.7 | 29.4 | 21.8   | 15.7 | 28.5 | 22.6   | 18.4 | 37.5 | 23.4   | 17.9 | 35.1 | 25.7   | 13.9 | 33   | 23.3   | 15.3 | 15.3 | 21.7   | 16.8 | 30.8 |
| PC34:3     | PC16:0-18:3            | 2.93   | 2.16 | 3.76 | 3.59   | 2.27 | 5.01 | 4.1    | 2.41 | 4.81 | 4.56   | 3.16 | 7.36 | 5.4    | 4.17 | 7.86 | 7.65   | 4.37 | 10.5 | 7.83   | 5.62 | 5.62 | 8.13   | 4.84 | 12   |
| PC34:2     | PC16:0_18:2            | 60.1   | 42.2 | 86.6 | 72.4   | 48.5 | 117  | 85.8   | 54.7 | 111  | 92.8   | 66.8 | 144  | 128    | 83.6 | 168  | 130    | 98   | 250  | 179    | 138  | 138  | 188    | 133  | 231  |
| PC34:1     | PC16:0_18:1            | 136    | 92.1 | 204  | 158    | 106  | 236  | 180    | 114  | 251  | 204    | 150  | 329  | 243    | 178  | 300  | 253    | 174  | 396  | 301    | 223  | 223  | 324    | 208  | 397  |
| PC36:4     | PC16:0_20:4            | 97.3   | 69.7 | 157  | 111    | 82.8 | 143  | 114    | 81   | 157  | 127    | 82   | 171  | 117    | 72.4 | 134  | 97     | 76.7 | 141  | 121    | 75.6 | 75.6 | 108    | 73.6 | 143  |
| PC36:3     | PC18:1_18:2            | 27.6   | 20.5 | 46.4 | 34.1   | 28.1 | 48.9 | 42.1   | 28.3 | 53.8 | 44.8   | 31.1 | 72.8 | 53.1   | 36.2 | 70.1 | 56.5   | 38.8 | 91.6 | 66.6   | 48.6 | 48.6 | 63     | 44   | 90   |
| PC36:2     | PC18:0_18:2            | 32.1   | 20.5 | 50.1 | 40.4   | 27.9 | 73.2 | 50.5   | 32.8 | 71.3 | 53.2   | 38.8 | 94   | 75.6   | 49.4 | 113  | 81.9   | 59.9 | 143  | 107    | 79.7 | 79.7 | 120    | 73.2 | 151  |
| PC36:1     | PC18:0_18:1            | 16.7   | 12.5 | 28.2 | 22.4   | 14.9 | 33.3 | 25.5   | 16.3 | 34.8 | 30.7   | 21.7 | 46.5 | 38     | 25.1 | 46.9 | 40.1   | 25.4 | 64.9 | 49.4   | 39.3 | 39.3 | 55.8   | 35.8 | 64.6 |
| PC38:6     | PC16:0_22:6            | 18.3   | 11.9 | 30.8 | 20.4   | 17.6 | 25.9 | 21.5   | 13.7 | 31.5 | 23.6   | 15.4 | 33.5 | 21.4   | 14.8 | 27.1 | 21.5   | 15   | 30.4 | 22.9   | 18.1 | 18.1 | 21.5   | 17   | 30.5 |
| PC38:5     | PC18:1_20:4            | 13.9   | 10.4 | 25.1 | 15.9   | 12.6 | 24.9 | 21.6   | 12.4 | 29.3 | 24.8   | 16.4 | 35.3 | 27.1   | 16.5 | 35.7 | 27.6   | 17.9 | 37.2 | 26.9   | 22.8 | 22.8 | 24.4   | 20.6 | 38   |
| PC38:4     | PC18:0_20:4            | 54.6   | 39.9 | 94.8 | 66     | 49.3 | 88.2 | 73.8   | 53.7 | 101  | 75.5   | 53.4 | 111  | 78     | 47.4 | 99   | 67     | 51.4 | 102  | 76.6   | 57.2 | 57.2 | 77.9   | 53.2 | 97.1 |
| PC38:3     | PC18:0_20:3            | 13.4   | 7.5  | 18   | 12.4   | 10.5 | 17.8 | 14.6   | 10.9 | 20.5 | 18.2   | 11.7 | 23.5 | 16.3   | 11.5 | 20.9 | 15.7   | 10.9 | 21.1 | 17.7   | 12.9 | 12.9 | 17.6   | 11   | 23.2 |
| PC40:6     | PC18:0_22:6            | 6.25   | 4.29 | 10.4 | 6.97   | 5.84 | 9.63 | 7.98   | 5.45 | 10.9 | 8.41   | 5.53 | 12.4 | 7.48   | 5.46 | 10.1 | 7.19   | 5.07 | 10.3 | 8.05   | 6.29 | 6.29 | 7.09   | 6.11 | 10.4 |

Postnatal adaptations of phosphatidylcholine metabolism in extremely preterm infants: implications for choline and polyunsaturated fatty acid metabolism. Goss K.C.W. "Online Supplementary Material"

### Online Supporting Material

**Supplementary Figure 1.** Daily nutrient intakes (mean +S.D.) were calculated over the first week of postnatal life using the Southampton Electronic Neonatal Nutrition Assessment Tool (SENNAT) (1).

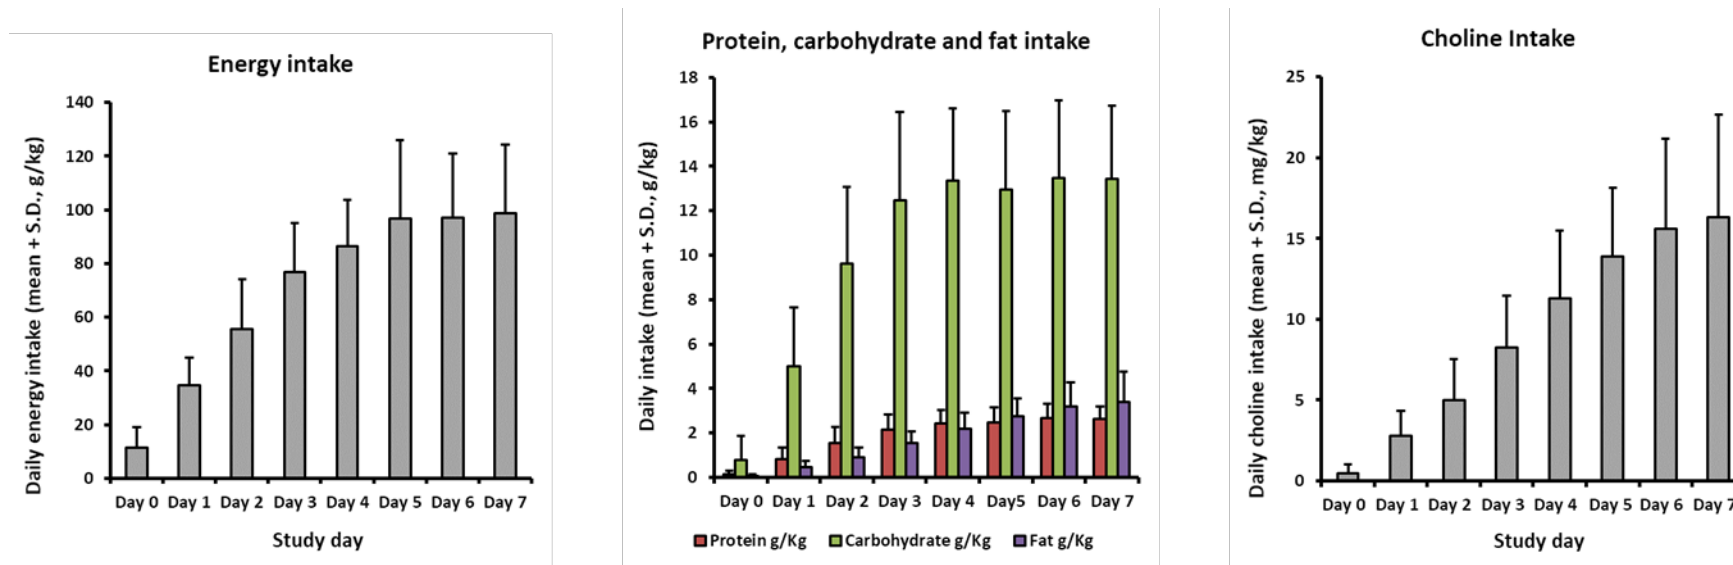

Postnatal adaptations of phosphatidylcholine metabolism in extremely preterm infants: implications for choline and polyunsaturated fatty acid metabolism. Goss K.C.W. "Online Supplementary Material"

### Online Supporting Material

**Supplementary Figure 2. Relative proportions of selected molecular species of plasma phosphatidylcholine for the three infants who started administration of TPN within the time frame of the study.** The time of TPN administration for each infants is indicated by the black arrow. The fractional content of PC species containing 18:2 increased after initiation of TPN for all three infants.

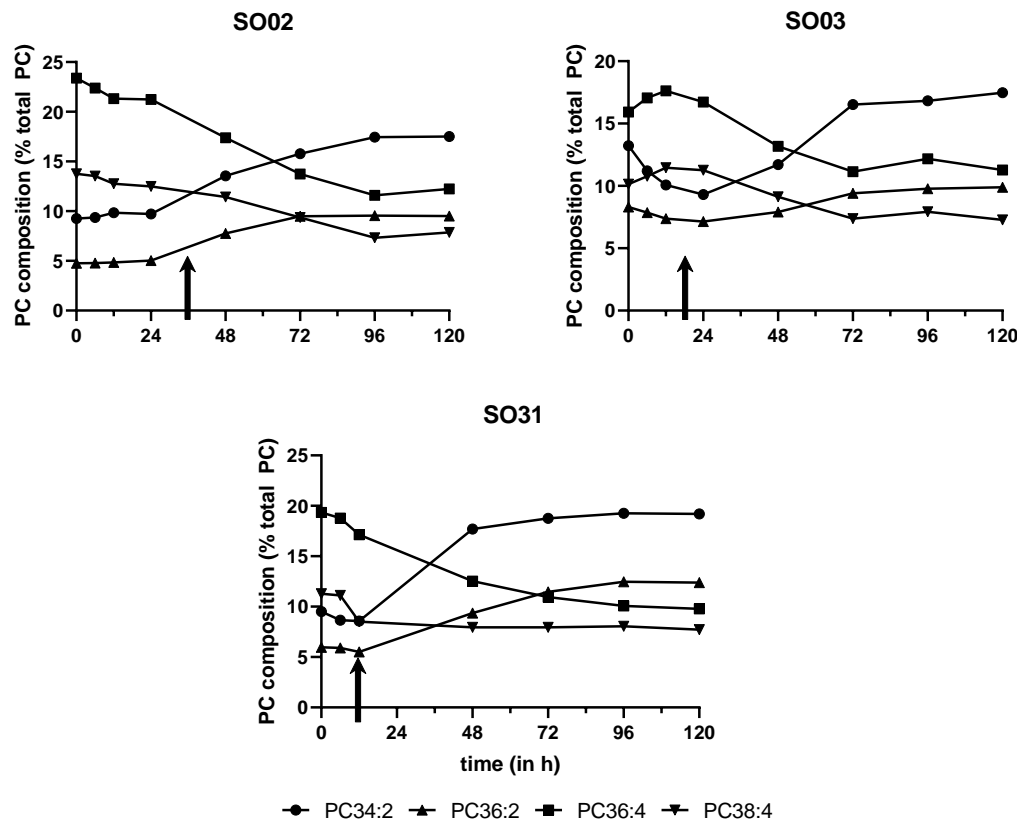

Postnatal adaptations of phosphatidylcholine metabolism in extremely preterm infants: implications for choline and polyunsaturated fatty acid metabolism. Goss K.C.W. "Online Supplementary Material"

### **Online Supporting Material**

### **Reference**

1. Johnson MJ, Pearson F., Emm A., Moyses HE, Leaf AA. Developing a new screening tool for nutritional risk in neonatal intensive care. [Acta Paediatr](#) 2015; 104: e90-93.
